# Supplementary figures and images for: CD36 Drives Metastasis and Relapse in Acute Myeloid Leukemia
Source: PubMed Central journal article supplement — Cancer Res. 2023 Jun 16;83(17):2824–38. doi: 10.1158/0008-5472.CAN-22-3682 (PMC10472106; doi:10.1158/0008-5472.can-22-3682), 2023-06-16

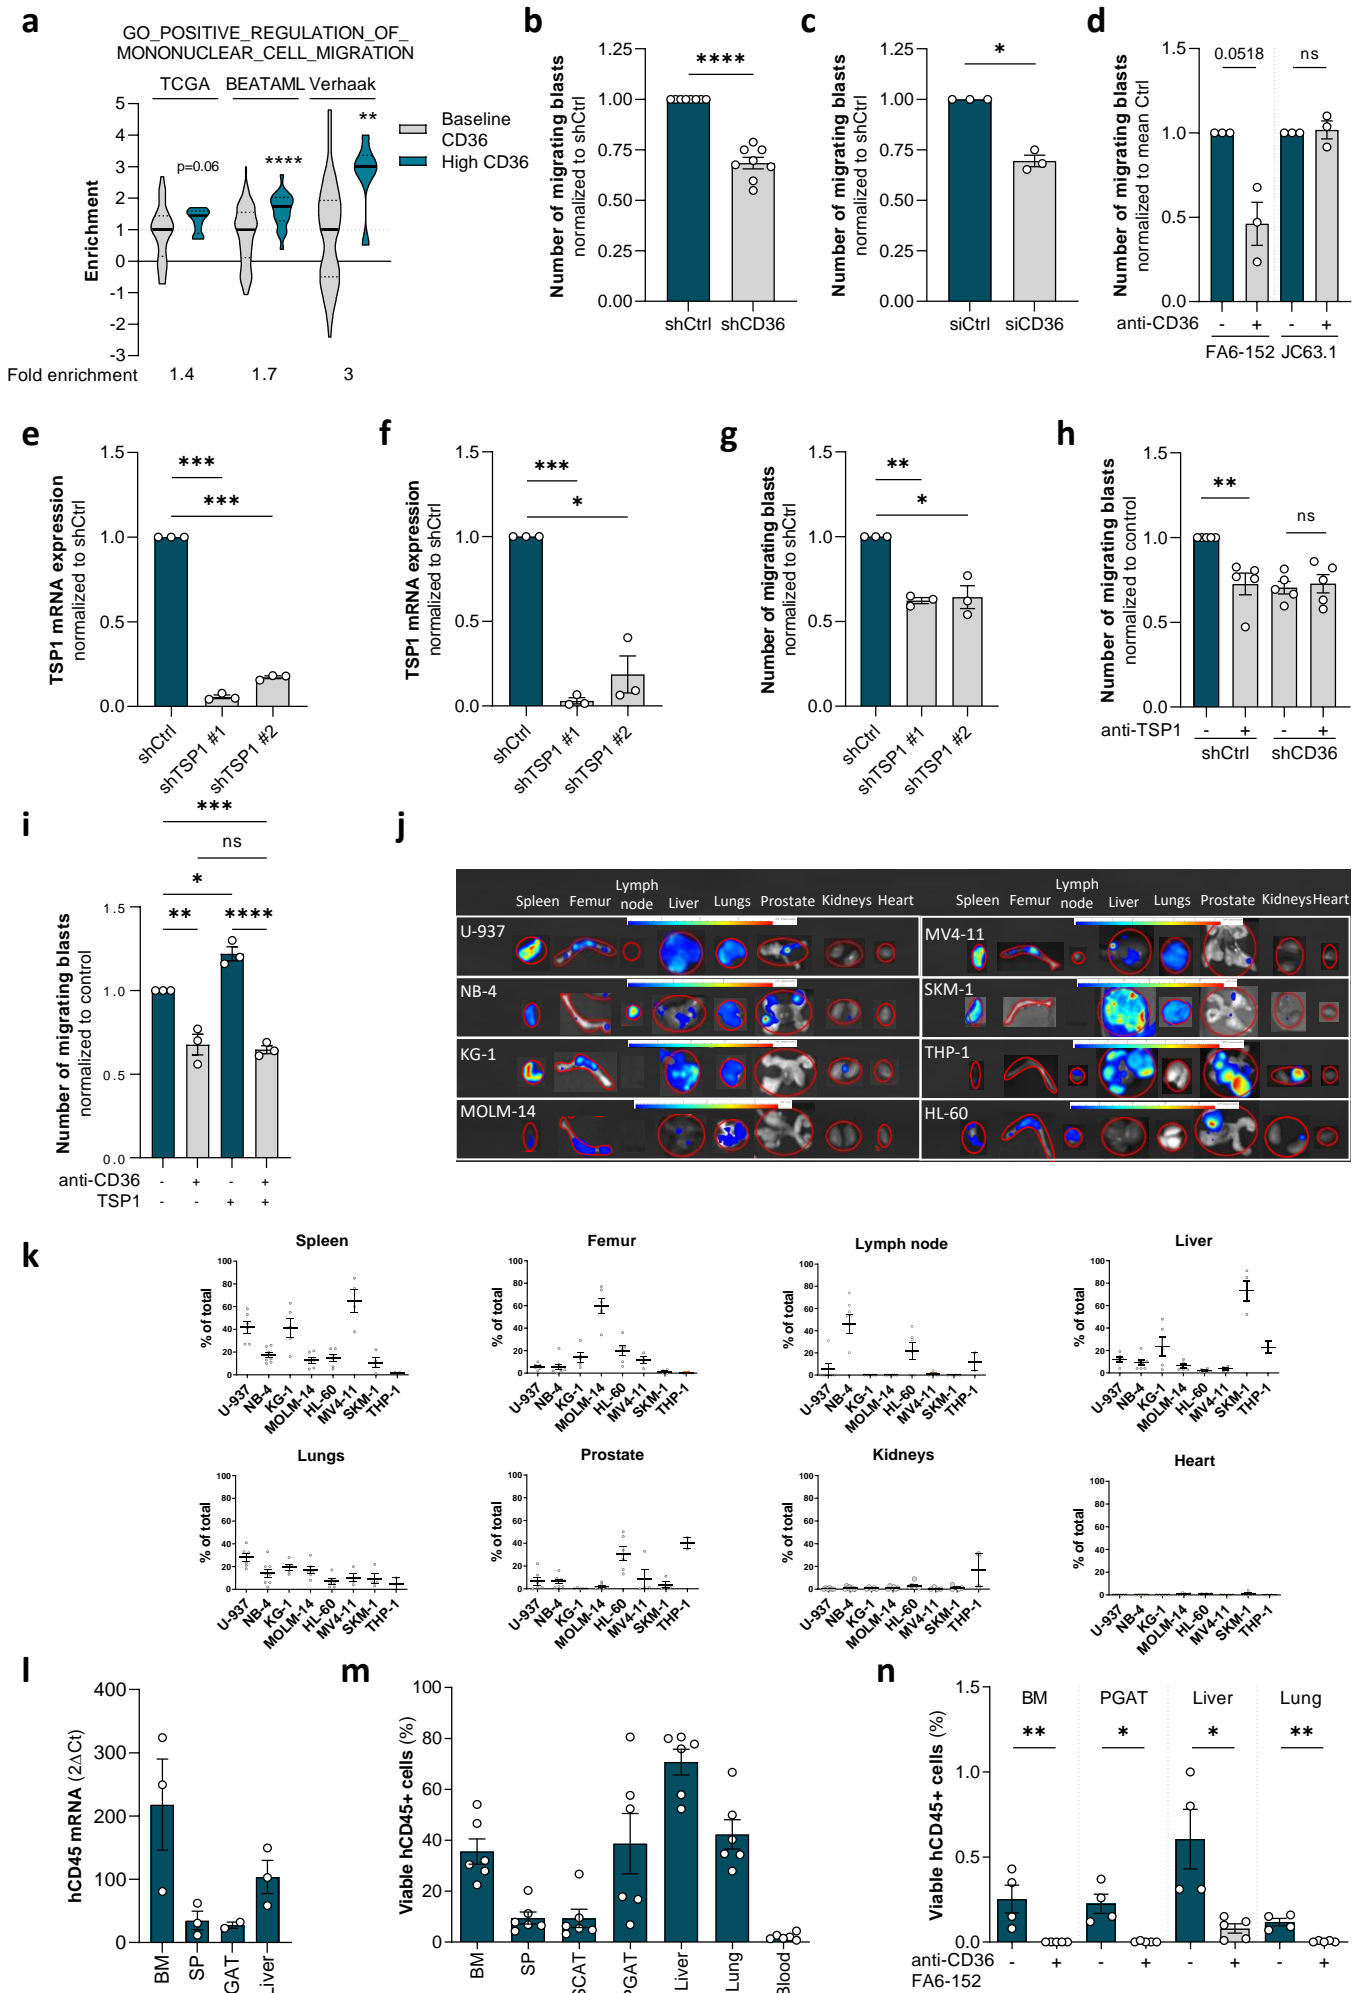

**Figure S2**

Supplement: can-22-3682_supplementary_data_suppsf2.pdf [file can-22-3682_supplementary_data_suppsf2.pdf]

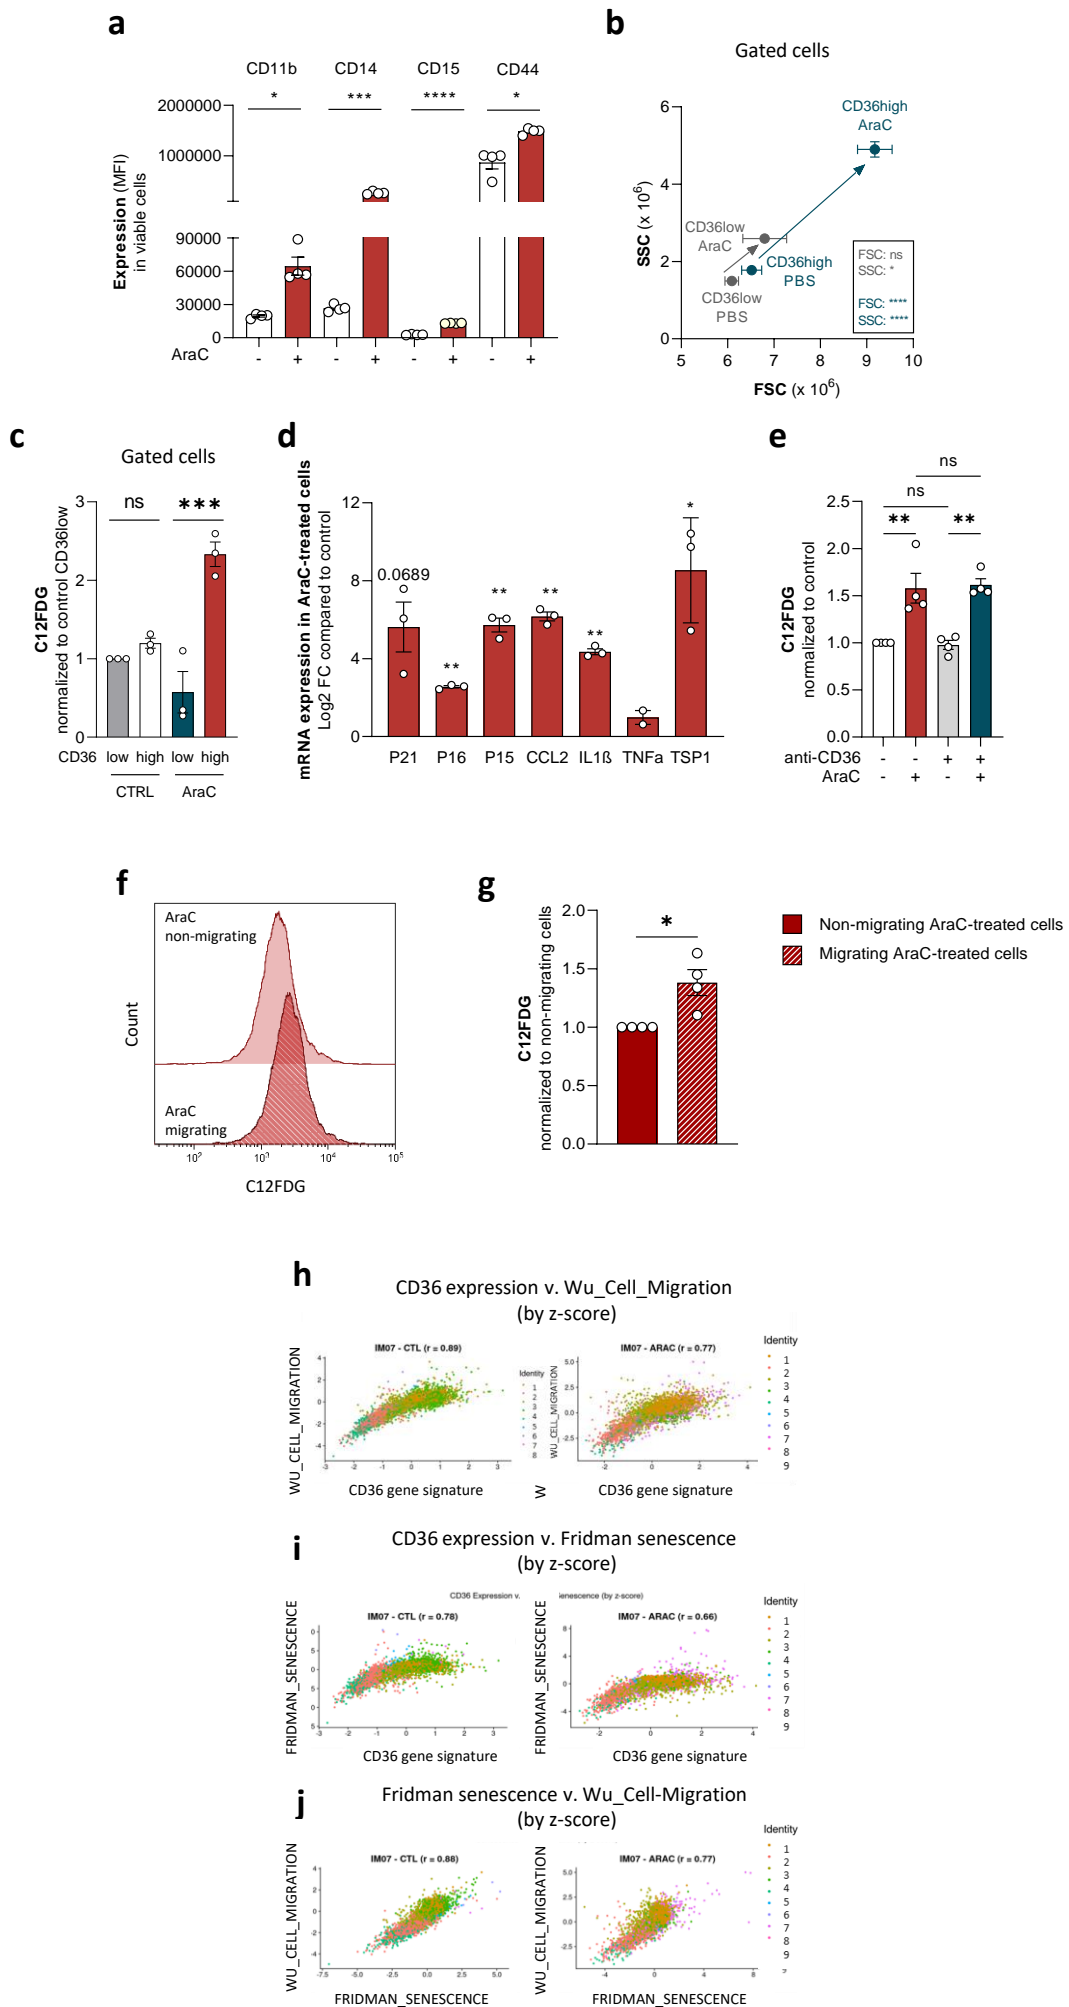

Figure S3

Supplement: can-22-3682_supplementary_data_suppsf3.pdf [file can-22-3682_supplementary_data_suppsf3.pdf]
